# Supplementary material for: The Formation of Hollow Trait in Cucumber (Cucumis sativus L.) Fruit Is Controlled by CsALMT2
Source: MDPI journal article supplement (doi:10.3390/ijms23116173), 2022-05-31
Supplement: s1 [file s1]

# The Formation of Fruit Hollow in Cucumber (*Cucumis sativus* L.) is Controlled by *CsALMT2*

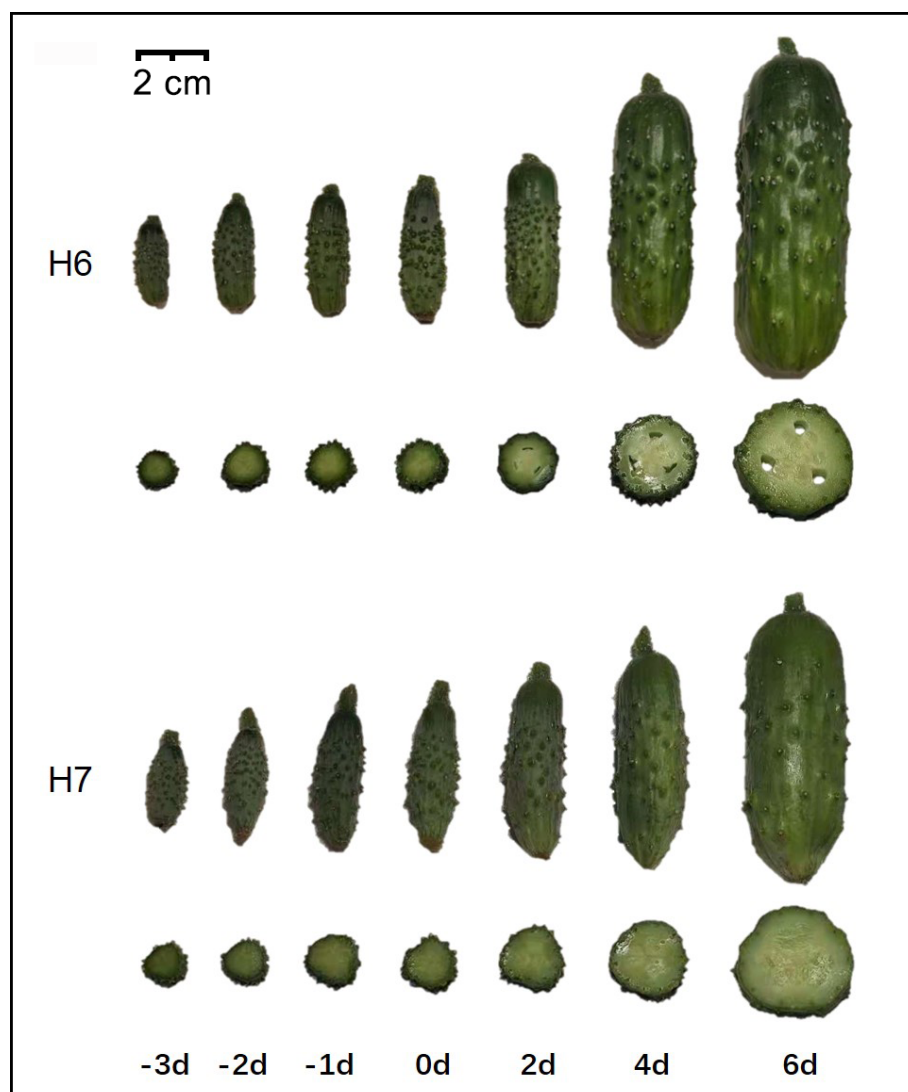

**Figure S1.** Hollow fruit trait of cucumber H6 and H7 from 3 days before flowering to 6 days after pollination. Scale bar = 1 cm.

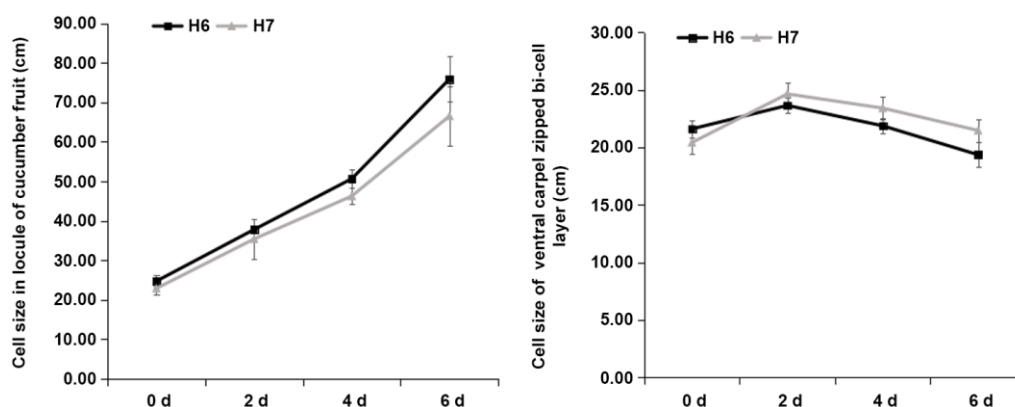

**Figure S2.** Cell size in locule and ventral carpel zipped bi-cell layer of cucumber fruit.

|                          |                                                              |     |
|--------------------------|--------------------------------------------------------------|-----|
| Benincasa_hispida        | MEMANDKSEGVLARWGEGLAKFSKLKAKVIELFRKTKKLAKDDPRRIVHSLKVGLAITL  | 60  |
| Cucumis_melo             | MEMSNEKSGGALARWSDGLKAKISKLKAKVIELFKKTKKLAKDDPRRIVHSLKVGLAITL | 60  |
| H7                       | MEMANEKSGGLLASWSEGLKAKISKIMAKVIELFKKTKKLAKDDPRRVHSLKVGLAITL  | 60  |
| Cucumis_sativus_Gyl4     | MEMANEKSGGLLASWSEGLKAKISKIMAKVIELFKKTKKLAKDDPRRVHSLKVGLAITL  | 60  |
| Cucumis_sativus_PI183967 | MEMANEKSGGLLASWSEGLKAKISKIMAKVIELFKKTKKLAKDDPRRVHSLKVGLAITL  | 60  |
| Cucumis_sativus_9930     | MEMANEKSGGLLASWSEGLKAKISKIMAKVIELFKKTKKLAKDDPRRVHSLKVGLAITL  | 60  |
| H6                       | MEMANEKSGGLLASWSEGLKAKISKIMTKVIELFKKTKKLAKDDPRRVHSLKVGLAITL  | 60  |
|                          | ***:*:* * * * * .*:*:*:*: :*****:*****:*****:***             |     |
| Benincasa_hispida        | VSLFYFPEPLYDGLGASAMWAILTVVVFEFSVGATLGRGLNRVLATFFAAALGFGAHFL  | 120 |
| Cucumis_melo             | VSLFYFPEPLYDGLGASAMWAILTVVVFEFSVGATFGRGLNRVLATFLAAALGFGVHFL  | 120 |
| H7                       | VSLFYFPEPLYDGLGASAMWAILTVVVFEFSIGATLGRGLNRVLATFLAAALGFGAHFL  | 120 |
| Cucumis_sativus_Gyl4     | VSLFYFPEPLYDGLGASAMWAILTVVVFEFSIGATLGRGLNRVLATFLAAALGFGAHFL  | 120 |
| Cucumis_sativus_PI183967 | VSLFYFPEPLYDGLGASAMWAILTVVVFEFSIGATLGRGLNRVLATFLAAALGFGAHFL  | 120 |
| Cucumis_sativus_9930     | VSLFYFPEPLYDGLGASAMWAILTVVVFEFSIGATLGRGLNRVLATFLAAALGFGAHFL  | 120 |
| H6                       | VSLFYFPEPLYDGLGASAMWAILTVVVFEFSIGATLGRGLNRVLATFLAAALGFGAHFL  | 120 |
|                          | *****:***:*****:*****:***                                    |     |
| Benincasa_hispida        | ADLAGDKAQIMLSLVFFL                                           | 140 |
| Cucumis_melo             | ADLAGDKAQIMLSLVFFL                                           | 140 |
| H7                       | ADLAGDTAQIMLSLVFFL                                           | 140 |
| Cucumis_sativus_Gyl4     | ADLAGDTAQIMLSLVFFL                                           | 140 |
| Cucumis_sativus_PI183967 | ADLAGDTAQIMLSLVFFL                                           | 140 |
| Cucumis_sativus_9930     | ADLAGDTAQIMLSLVFFL                                           | 140 |
| H6                       | ADLAGDTAQIMLSLVFFL                                           | 140 |
|                          | ***** *****                                                  |     |

**Figure S3.** Alignment of the multiple protein sequence of CsALMT2.

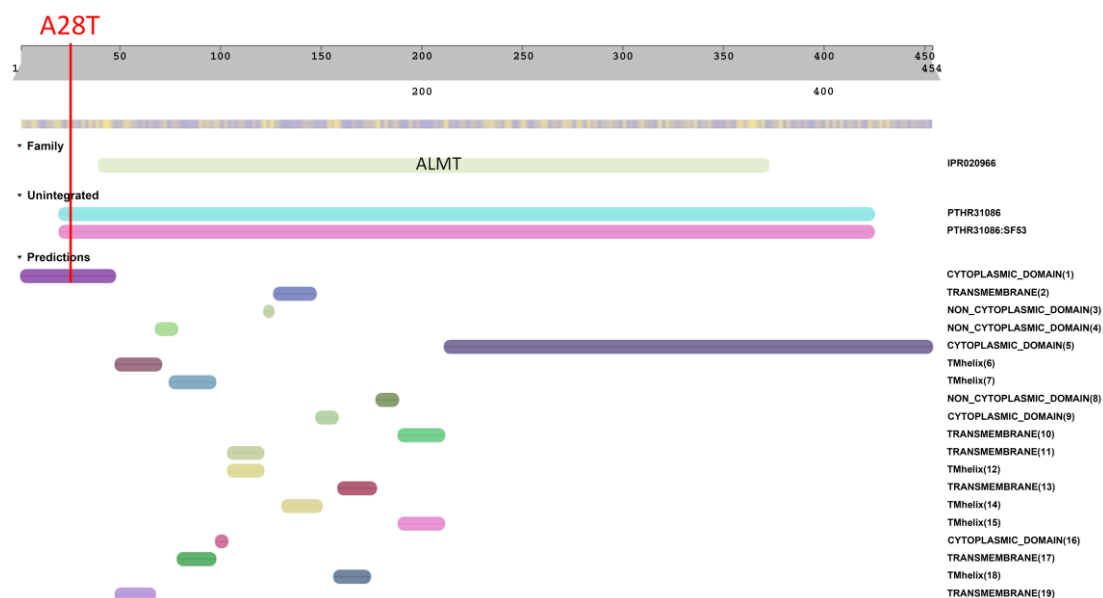

**Figure S4.** Domain analysis of CsALMT2.

**Table S1.** Investigation on hollow trait of cucumber varieties in different regions of China.

| Classification   | Variety number | Provinces | Hollow Character |
|------------------|----------------|-----------|------------------|
| North China type | ZhongNong38    | Beijing   | Non-hollow       |
|                  | ZhongNong48    | Beijing   | Non-hollow       |
|                  | ZhongNong106   | Beijing   | Non-hollow       |
|                  | 18C54          | Beijing   | Non-hollow       |
|                  | 18C56          | Beijing   | Non-hollow       |
|                  | YD109          | Jiangsu   | Non-hollow       |
|                  | YD110          | Jiangsu   | Non hollow       |
|                  | JYXM           | Beijing   | Non-hollow       |
|                  | JYXM2          | Beijing   | Non-hollow       |
|                  | JYCQL2         | Beijing   | Non-hollow       |
|                  | YueFeng        | Guangdong | Non-hollow       |
|                  | ChuanCui13     | Sichuan   | Non-hollow       |
| South China type | HN1            | Hunan     | Hollow           |
|                  | HN2            | Hunan     | Hollow           |
|                  | HN3            | Hunan     | Hollow           |
|                  | HN4            | Hunan     | Hollow           |
|                  | LiFeng2        | Guangdong | Hollow           |
|                  | LiFeng3        | Guangdong | Hollow           |
|                  | ZaoQing8       | Guangdong | Hollow           |
|                  | 15D036         | Chongqing | Hollow           |
|                  | 15D044         | Chongqing | Hollow           |
|                  | 15D088         | Chongqing | Hollow           |
|                  | 15D095         | Chongqing | Hollow           |
|                  | YanBai         | Chongqing | Hollow           |
|                  | ChuanLv11      | Sichuan   | Non-hollow       |
|                  | ChuanLv15      | Sichuan   | Hollow           |
|                  | ChuanCai19-1   | Sichuan   | Non-hollow       |
|                  | ChuanCai19-2   | Sichuan   | Hollow           |
|                  | ChuanCai19-3   | Sichuan   | Hollow           |

**Table S2.** Percentage of average hollow area of P<sub>1</sub>, P<sub>2</sub>, F<sub>1</sub> and F<sub>2</sub> population plants.

| Generation     | Sample number | Percentage of average hollow area (%) | Range (%)  | CV (%) |
|----------------|---------------|---------------------------------------|------------|--------|
| P <sub>1</sub> | 19            | 8.17±2.35a                            | 4.16~13.11 | 28.72  |
| P <sub>2</sub> | 20            | 0c                                    | 0.00~0.00  | 0      |
| F <sub>1</sub> | 20            | 4.54±2.21b                            | 1.33~10.74 | 48.67  |
| F <sub>2</sub> | 345           | 4.95±3.92b                            | 0.00~19.54 | 79.17  |

Note: Values followed by different letters (a-c) : Significantly different ( $p < 0.01$ ).

**Table S3.** Frequency distribution of hollow area percentage.

| Generation     | Hollow area percentage (%) |         |         |         |         |          |           |           |           |           |           | Sample number | Sample average (%) | Standard deviation (%) |
|----------------|----------------------------|---------|---------|---------|---------|----------|-----------|-----------|-----------|-----------|-----------|---------------|--------------------|------------------------|
|                | 0.0                        | 0.1–2.0 | 2.1–4.0 | 4.1–6.0 | 6.1–8.0 | 8.1–10.0 | 10.1–12.0 | 12.1–14.0 | 14.1–16.0 | 16.1–18.0 | 18.1–20.0 |               |                    |                        |
| P <sub>1</sub> | -                          | -       | -       | 3       | 7       | 6        | 1         | 2         | -         | -         | -         | 19            | 8.17               | 2.35                   |
| P <sub>2</sub> | 20                         | -       | -       | -       | -       | -        | -         | -         | -         | -         | -         | 20            | 0                  | 0                      |
| F <sub>1</sub> | -                          | 2       | 6       | 8       | 3       | -        | 1         | -         | -         | -         | -         | 20            | 4.54               | 2.21                   |
| F <sub>2</sub> | 7                          | 91      | 65      | 60      | 49      | 36       | 15        | 13        | 6         | 1         | 2         | 345           | 4.95               | 3.92                   |

**Table S4.** Raw sequencing data statistics.

| Sequencing data ID        | Number of raw reads | Number of raw bases | GC%    | Bases Q30% |
|---------------------------|---------------------|---------------------|--------|------------|
| F <sub>2</sub> hollow     | 44,635,824 bp       | 6,695,373,600 bp    | 38.91% | 91.79%     |
| F <sub>2</sub> non-hollow | 40,274,958 bp       | 6,041,243,700 bp    | 39.19% | 91.86%     |
| H6                        | 36,593,864 bp       | 5,489,079,600 bp    | 39.59% | 91.40%     |
| H7                        | 38,006,642 bp       | 5,700,996,300 bp    | 39.46% | 90.29%     |

**Table S5.** Comparison data statistics.

| Sequencing data ID        | Genome length  | Number of bases compared | Coverage | Average depth |
|---------------------------|----------------|--------------------------|----------|---------------|
| F <sub>2</sub> hollow     | 196,481,733 bp | 190,317,945 bp           | 97.00%   | 17.68         |
| F <sub>2</sub> non-hollow | 196,481,733 bp | 190,672,050 bp           | 97.00%   | 23.14         |
| H6                        | 196,481,733 bp | 190,568,736 bp           | 97.00%   | 21.46         |
| H7                        | 196,481,733 bp | 190,435,487 bp           | 97.00%   | 19.12         |

**Table S6.** Plant cis-acting regulatory elements prediction of *CsALMT2*.

| Promoter element | Sequence   | Function                                                            | Organism                    |
|------------------|------------|---------------------------------------------------------------------|-----------------------------|
| ABRE             | ACGTG      | cis-acting element involved in the abscisic acid responsiveness     | <i>Arabidopsis thaliana</i> |
| ACE              | CTAACGTATT | cis-acting element involved in light responsiveness                 | <i>Petroselinum crispum</i> |
| ARE              | AAACCA     | cis-acting regulatory element essential for the anaerobic induction | <i>Zea mays</i>             |
| AT-rich sequence | TAAAATACT  | element for maximal elicitor-mediated activation (2copies)          | <i>Pisum sativum</i>        |
| G-box            | TACGTG     | cis-acting regulatory element involved in light responsiveness      | <i>Arabidopsis thaliana</i> |
| GCN4-motif       | TGAGTCA    | cis-regulatory element involved in endosperm expression             | <i>Oryza sativa</i>         |
| MBS              | CAACTG     | MYB binding site involved in drought-inducibility                   | <i>Arabidopsis thaliana</i> |
| P-box            | CCTTTTG    | gibberellin-responsive element                                      | <i>Oryza sativa</i>         |
| TC-rich repeats  | GTTTTCTTAC | cis-acting element involved in defense and stress responsiveness    | <i>Nicotiana tabacum</i>    |
| TCA-element      | CCATCTTTTT | cis-acting element involved in salicylic acid responsiveness        | <i>Nicotiana tabacum</i>    |
| TGA-element      | AACGAC     | auxin-responsive element                                            | <i>Brassica oleracea</i>    |

**Table S7.** KASP primer information.

| <b>Cucumber-SNP ID</b> | <b>Primer name</b> | <b>Primer sequence</b>                            |
|------------------------|--------------------|---------------------------------------------------|
| CHM1_19454233          | Primer_AlleleX     | GAAGGTGACCAAGTTCATGCTATACCTCGTTCAGTTCTTCTGTGTG    |
|                        | Primer_AlleleY     | GAAGGTCGGAGTCAACGGATTTAATACCTCGTTCAGTTCTTCTGTGTA  |
|                        | Primer_Common      | GAAGAGCAGATAAACATAACCCCTTCAAAA                    |
| CHM1_19830655          | Primer_AlleleX     | GAAGGTGACCAAGTTCATGCTCTGCGTTACAGGAAGACTGTCAG      |
|                        | Primer_AlleleY     | GAAGGTCGGAGTCAACGGATTACTGCGTTACAGGAAGACTGTCAA     |
|                        | Primer_Common      | CGGAGGGGATGGAAATGATAGAGTT                         |
| CHM1_20065780          | Primer_AlleleX     | GAAGGTGACCAAGTTCATGCTCATCGCTATCAGTGGCCAAGATAAT    |
|                        | Primer_AlleleY     | GAAGGTCGGAGTCAACGGATTATCGCTATCAGTGGCCAAGATAAC     |
|                        | Primer_Common      | GTTAGATAATCATTTTGCTTAACCTACAAGGTTT                |
| CHM1_21642977          | Primer_AlleleX     | GAAGGTGACCAAGTTCATGCTAGGAATGCCAGCTAAAATCATTCTTGA  |
|                        | Primer_AlleleY     | GAAGGTCGGAGTCAACGGATTGGAATGCCAGCTAAAATCATTCTTGC   |
|                        | Primer_Common      | TAACAATGGTGAAATGGATGACTTTCTAGTT                   |
| CHM1_21892895          | Primer_AlleleX     | GAAGGTGACCAAGTTCATGCTCTTGTACATTTTCAATCATTGGGATTGC |
|                        | Primer_AlleleY     | GAAGGTCGGAGTCAACGGATTCTTGTACATTTTCAATCATTGGGATTGT |
|                        | Primer_Common      | CATCGCCGGTGGTGACTTGACTT                           |
| CHM1_25854734          | Primer_AlleleX     | GAAGGTGACCAAGTTCATGCTGGAAGTACCAATGCAAGTATTCCCT    |
|                        | Primer_AlleleY     | GAAGGTCGGAGTCAACGGATTGAAGTACCAATGCAAGTATTCCCC     |
|                        | Primer_Common      | CTCCTAGCCCTAGTGATCCTAATCTT                        |
| CHM1_28330443          | Primer_AlleleX     | GAAGGTGACCAAGTTCATGCTCTATGTACTGATGAAGGAGTATGAGAAT |
|                        | Primer_AlleleY     | GAAGGTCGGAGTCAACGGATTTATGTACTGATGAAGGAGTATGAGAAG  |
|                        | Primer_Common      | GCAAGAACTGTAGTCTCAATGAAGCAA                       |

|               |                |                                                        |
|---------------|----------------|--------------------------------------------------------|
|               | Primer_AlleleX | GAAGGTGACCAAGTTCATGCTCTACCCAAAGCTCCGATTCCGA            |
| CHM1_28340789 | Primer_AlleleY | GAAGGTCGGAGTCAACGGATTACCCAAAGCTCCGATTCCGG              |
|               | Primer_Common  | TACCGTTTCCTTCGGCCGCCTT                                 |
|               | Primer_AlleleX | GAAGGTGACCAAGTTCATGCTCTAATCTTTTCTAAAGGGATCTAGTTTGTTT   |
| CHM1_28663072 | Primer_AlleleY | GAAGGTCGGAGTCAACGGATTCTAATCTTTTCTAAAGGGATCTAGTTTGTTA   |
|               | Primer_Common  | GTCAAACATGAGTTGGAAACCTCTTGATA                          |
|               | Primer_AlleleX | GAAGGTGACCAAGTTCATGCTCTACATCTAATCCTTATTCTTGAGCAGAA     |
| CHM1_28681211 | Primer_AlleleY | GAAGGTCGGAGTCAACGGATTACATCTAATCCTTATTCTTGAGCAGAG       |
|               | Primer_Common  | CATCACATTGTTGACATGAATCCAACCTGTA                        |
|               | Primer_AlleleX | GAAGGTGACCAAGTTCATGCTTTCTTTTCAATAAGCGACATTATTTCTCGA    |
| Chr1_21902047 | Primer_AlleleY | GAAGGTCGGAGTCAACGGATTTTCTTTTCAATAAGCGACATTATTTCTCGT    |
|               | Primer_Common  | ATATGGAAAATTGAGAGGTAGAAAATGGAAATAA                     |
|               | Primer_AlleleX | GAAGGTGACCAAGTTCATGCTCCTTAAACAGTCTCTCTAGCCACTA         |
| Chr1_22288154 | Primer_AlleleY | GAAGGTCGGAGTCAACGGATTCCTTAAACAGTCTCTCTAGCCACTT         |
|               | Primer_Common  | CACCCTTTCAAGAGAAAAAGGGCCTTT                            |
|               | Primer_AlleleX | GAAGGTGACCAAGTTCATGCTTGGGATTAAGATTAGGATTAGTTTACTTTTG   |
| Chr1_23662100 | Primer_AlleleY | GAAGGTCGGAGTCAACGGATTATTGGGATTAAGATTAGGATTAGTTTACTTTTA |
|               | Primer_Common  | CTACTACAGTTAATTTTTTAATAAGAGAAACTGAA                    |
|               | Primer_AlleleX | GAAGGTGACCAAGTTCATGCTAAACATACATGAACGTTTCAAACGTCAC      |
| Chr1_24702649 | Primer_AlleleY | GAAGGTCGGAGTCAACGGATTATAAACATACATGAACGTTTCAAACGTCAT    |
|               | Primer_Common  | AACTAAATTATTGTTTAAAGTTGCGACTTGAAATT                    |
|               | Primer_AlleleX | GAAGGTGACCAAGTTCATGCTGAGCTAAGGTGGGACGACAAAAC           |
| Chr1_24906295 | Primer_AlleleY | GAAGGTCGGAGTCAACGGATTGAGCTAAGGTGGGACGACAAAAT           |
|               | Primer_Common  | TTTGGCCGCCGTCACAAGCTAAAAT                              |



|               |                |                                                     |
|---------------|----------------|-----------------------------------------------------|
| Chr1_25118463 | Primer_AlleleX | GAAGGTGACCAAGTTCATGCTGCGTTTAGGGTTTTGGTTCTGTTTTG     |
|               | Primer_AlleleY | GAAGGTCGGAGTCAACGGATTGCGTTTAGGGTTTTGGTTCTGTTTTC     |
|               | Primer_Common  | TGCAATTCCAAGAATCTTCAGTCAGCTT                        |
| Chr1_25185078 | Primer_AlleleX | GAAGGTGACCAAGTTCATGCTCTATCTTTCCTCCCATTTCCTTCTTT     |
|               | Primer_AlleleY | GAAGGTCGGAGTCAACGGATTATCTTTCCTCCCATTTCCTTCTTG       |
|               | Primer_Common  | GGGAGAACCTGAGTTGAGATTGAATATAT                       |
| Chr1_25203154 | Primer_AlleleX | GAAGGTGACCAAGTTCATGCTATCAACCAACAACATCAGCCTCAAC      |
|               | Primer_AlleleY | GAAGGTCGGAGTCAACGGATTGATCAACCAACAACATCAGCCTCAAT     |
|               | Primer_Common  | GTTTTGGTCTTTACTTCTTATGATTGTAGTAAATT                 |
| Chr1_25430140 | Primer_AlleleX | GAAGGTGACCAAGTTCATGCTGTCTAAATCGCCAAAATTGAACACTTAAAT |
|               | Primer_AlleleY | GAAGGTCGGAGTCAACGGATTTCTAAATCGCCAAAATTGAACACTTAAAC  |
|               | Primer_Common  | CCCACTTCTAATTTGAGTATAAGAAGTAAAATTT                  |
| Chr1_25510362 | Primer_AlleleX | GAAGGTGACCAAGTTCATGCTCAACCAACTGACTTCAGTTTGGTCA      |
|               | Primer_AlleleY | GAAGGTCGGAGTCAACGGATTAACCAACTGACTTCAGTTTGGTCG       |
|               | Primer_Common  | TTAGGGGTGAGCATGATAGGTTGAAAAA                        |

---

**Table S8.** Amino acid sequence for construction phylogenetic tree of ALMT2.

| Name    | Amino Acid Sequence                                                                                                                                                                                                                                                                                                                                                                                                                                                                      |
|---------|------------------------------------------------------------------------------------------------------------------------------------------------------------------------------------------------------------------------------------------------------------------------------------------------------------------------------------------------------------------------------------------------------------------------------------------------------------------------------------------|
| CsALMT2 | MEMANEKSGGLASWSEGLKAKISKIMAKVIELFKKTKKLAKDDPRRVVHSLKVGLAITLVSLFYFFEPLYDGLGASAMWAI<br>LTVVVVFESIGATLGRGLNRVLATFLAAALGFGAHFLADLAGDTAQPIMLSLSVFFLAAITTFVRFFPRIKARYDYGFLIFILT<br>FCLVSVSGYREDEILKVAYRRALTILIGTFIAILICILICPVWAGDDLHSLVSNNIEQLANFFQGFVEYSNEWKEDEGIVEGFKS<br>VLTSRQTEESLVNFARWEPGHGTFKFRHPWKQYRKIGSLTRQCAYRLESLNTYLLAESQTPLHIRDQLKESCSKMSTESGKAL<br>KDLASSIRTMTPRLPNPHIEKSKAAAKDLKAALKIRPCNSSIDLEIVPMATVASLLIDSISCIEKIAESVGELASLANFKRFEV<br>EKSASLKFQQEQQQKLATPAIVSGHCHVVTID    |
| CmALMT2 | MEMSNEKSGGALARWSDGLKAKISKLKAKVIELFKKTKKLAKDDPRRIVHSLKVGLAITLVSLFYFFEPLYDGLGASAMWAI<br>LTVVVVFESVSGATFGRGLNRVLATFLAAALGFGVHFLADLAGDKAQPIMLSLSVFFLAAITTFVRFFPRIKARYDYGFLIFILT<br>FCLVSVSGYREDEILKVAYRRALTILIGTFIAILICILICPVWAGDDLHSLVSNNIEQLANFFQGFVEYSNEWKEDERIVEGFKS<br>VLSSRQTEESLVNFARWEPHGHGTFKFRHPWKQYSRIGSLTRQCAYRLESLNTYLLAESQTPLHIRDQLKESCTKMSTESGKAL<br>KDLASSIRTMTPRLPNPHIEKSKAAAKDLKAALKIRPCNSSIDLEIVPMATVASLLIDSISCIEKIAESVGELASLANFKCLEV<br>GKSASLKFQQEQQQKLATPAIVSGHCHVVTVD |
| BhALMT2 | MEMANDKSEGVLARWGEGLEAKFSKCLKAKVIELFRKTKKLAKDDPRRIVHSLKVGLALTLVSLFYFFEPLYDGLGASAMWA<br>ILTVVVVFESVSGATLGRGLNRVLATFFAAALGFGAHFLADLAGDKAQPIMLSLSVFFLATITTFVRFFPRLKARYDYGFLIFIL<br>TFCLVSVSGYREDEILNVAYRRALTILIGTFIAILICICICPVWAGDDLHSLVSNNIELLANFLEGFGGQYSNEWKENEVVEECK<br>SVLTSRQTEESLVNFARWEPGHGTFKFRHPWKQYRKIGSLTRQCAYRLESLNTYLVTECQTPLHIRDQLKESCSKMSIESKAL<br>KVLASAIRTMTRPTFPNPHIERSKAVAKDLKAALKIRPCDSGMDLLEIVPMATVASLLIDSISCIEKIAESVGELASLANFKCVE<br>VGKSASMKLEQHQEQLPTPAIVNGHCHVVTID |
| McALMT2 | MEMADHKSEGVSSARWAEGLRAKSSRLTVKVGELARKTKKLAKDDPRRIAHSLKVALAITLVSLFYFFEPLYDGFASAMW<br>AILTVVVVFESVSGATLGRGLNRVLATFSAAALGFGAHFLADLAADKGEPILAFFVFLAATTTFVRFFPRIKARYDYGFLIFI<br>LTFCLVSVSGYRDDEILQVAYTRALTILIGTFIAILICIFICPVWAGEDLHSLVSNNVELLGNFLQGFGARYSDEWKGDQVEGC<br>KSVLTSRQTEESLVNFARWEPGHGSFKFRHPWKQYRKIGSLTRQCAYRLESLNGYLTETQIPLHIRDQLKDSCSKMSIESGKA<br>LKDLASAIRTMTRPTFPNPHVEKSKAAAKNLKVALKIGPCNDGIDLLEIVPAATVASLLIDSISCIEKIAESVGELASMAQFKK<br>CVEAGKLAGLELEQDQQQNLPTPAIVNGHCHVV      |

---

|         |                                                                                                                                                                                                                                                                                                                                                                                                                                                                                       |
|---------|---------------------------------------------------------------------------------------------------------------------------------------------------------------------------------------------------------------------------------------------------------------------------------------------------------------------------------------------------------------------------------------------------------------------------------------------------------------------------------------|
| CcALMT2 | ESIKALLGKMRTKVTEFPGKIKKLGQDDPRRIVHSLKVGLAITLVSLFYFDPLYVGFSSAMWAVLTVVVVFEFSVGATLGK<br>GLNRGLATFLAGSLGFGAHLATLPGEKFQIPILLGFFVFLATTVSFIRFFPRMKARYDYGLVIFILTFCLISVSGYRDEEVLELA<br>HKRVSTILIGGFTALFVCIFICPVWAGDDLHNLAANNIEKLANFLEEFGEYFKESKDRESNKAQLQGYKSVLNSKQNEESLV<br>NFARWEPRHGRFRFRHPWKQYQKIGSLTRHCAYRVEALNGYLSNDVKASLETRGKIKEACMKLSCESGKALKELASALRT<br>MTQPPSQCPHIAKSKNAANSLKSLLKTGLCKDIDLQEIVAVATVASLLLDVLSCTERISESVHEIASLARFKSLEDDKVADGAK<br>INQKGQVNNKPCSNSIEQPNHHVITID           |
| XsALMT2 | VADQKEAGMIFRGWGWLKAFFPGKIISKVVEFARKTKKLGQDDPRRIIHSLKVGLAITLVSMFYFFEPLYDGFVGSAMWAVLT<br>VVVVFEFSVGATLSKGFNRGLATFLAGTLGFGAHLAILSGEKAEPILLGLFVFLAAMMTFVRFFPRMKAKYDYGVLVFLT<br>FCLISVSGYRDDEVLEMAHKRVSTILLGGFAALLVCIVICPVWAGNDLHNLVANNIEQLASFLEGFGPEYFNTSEDVESNNTL<br>LEGYKSVLHSHKQTEESLANFARWEPCHGQFRFGHPWKHYLKIGSLTRKCAYRIEALHGYNLTKNQTSQEIRSKIQDESIKVSS<br>ESVKALKELAMAIETMITPSAATLHITKSIAAKNLKMLNADLCKETDLLEVIPAFTMASLLVDVVSCEKIAESVHELASL<br>AKFKSVKPEVAARKPSLQKMQSYSSVNVVSQSHHVITVE |
| CoALMT2 | ESIKALVGKMRTKVTEFPGKIKKLGQDDPRRIVHSLKVGLAITLVSLFYFDPLYVGFSSAMWAVLTVVVVFEFSVGATLGK<br>GLNRGLATFLAGSLGFGAHLATLPGEKFQIPILLGFFVFLATTVSFIRFFPRMKARYDYGLVIFILTFCLISVSGYRDEEVLELA<br>HKRVSTILIGGFTALFVCIFICPVWAGDDLHNLAANNIEKLANFLEEFGEYFKESGDRESNKAQLQGYKSVLNSKQNEESLV<br>NFARWEPRHGRFRFRHPWKQYQKIGSLTRHCAYRVEALNGYLSNDVKASVETRKGKIKEACMKLSSESGLKALNELALAVRT<br>MTQPPSECPHIAKSKNAANSLKSLLKTGLCKDIDLQEIVAVATVASLLLDVLSCTEKISESVHELASLARFKGVEDDQVADGE<br>KKLNQKGEVNNKSCSNSIEQPNHHVITID        |
| PdALMT2 | QNNGGCFSRGCGWIKSLPERSKAKIVECARKIKKLGQDDPRRVNHSVKVGLAITLVSLFYFFEPLYDGFSDSAMWAVMTVV<br>VVFEFSVGATLGRGLNRGLATFLAGALGFGAHLATLSGEKGEPMLLGLFVFLATTVTFTVRFFPRMKARYDYGLLIFILTFCL<br>LISVSGYRDDEVLDMAHKRVSTILIGGLTAVLVCICICPVWAGDDLHNLAATNIEKLGIFLEHFGVEFFRKPGESESINKASLQ<br>GYKSVLNSKNMEESLVNFARWEPGHGQFKFRHPWKHYLKFGSLTRQCAIRVEALNGYLSNDIKTPPEIQGMIQDSCTKMSS<br>ELGKALKELALAIKRMTTPSSASSHLVKSNAAKNLKFLYSDLCSGINLLEVPAFTVTSLLEVISCTEKIAEAIHELASLAQ<br>FENVEQERPKLPEQGEMQQGANMDVHHHVITID       |
| CiALMT2 | VSGWGRLKALPGRGLTKIVEAAMKIKKLGQDDPRRIIHSLKVGLAITLVSLIYYVESLYEGFGGSAMWAILTVIVVLEFSVGAT<br>LGRGLNRGLATFIAGALGFGAHLASRSGDKVEPMLLGLFVFLIAGLVTFTIRFFPQMKARYDYGLLIFMLTFCLVVISGYRDED<br>LLDVAHRRVSTILIGSFTSVFVCICICPVWAGDDLHNLVASNIENLGSFLQGFGIEYFKISGEFGESKTAVMQRYKTVLNSKQSE<br>SLANFARWEPGHGQFRFSHPWKQYLKIGSLTRQCAIRIDALNGYLNSEIRTPPEFLSKIQATCTMMSMESGKALTELASVIKT                                                                                                                          |

---

|         |                                                                                                                                                                                                                                                                                                                                                                                                                                                                                                 |
|---------|-------------------------------------------------------------------------------------------------------------------------------------------------------------------------------------------------------------------------------------------------------------------------------------------------------------------------------------------------------------------------------------------------------------------------------------------------------------------------------------------------|
|         | <p>MTPPSSAKPHIAKSENAAKGLKSLQAGLCKDIDLLEVLPAATVASLLVDVVSSTEKITESINELATLARYESIEHIIIVDEKEAA<br/>ESLHLQPIAPCSNTSGEHHVITID</p>                                                                                                                                                                                                                                                                                                                                                                       |
| ArALMT2 | <p>SHAEAGPFTRAHWLKAPEKLWSKFVSVATKAKKLGQDDPRRIVHSLKVGLAITLVSLFYFFELYDGLGVSAMWAVLTV<br/>VVVFEFSVGATLGRGVNRGLATLLAGALGFGAHLASFSGNICEPILLGLFVFLAAVVTYIRFFPRMKARYDYGLLIFILTFCL<br/>ISVSGYRDDEVLDMAQKRLSTILIGGATALFVCVFICPVWAGDDLHNLAANMEKLGSFLEGFGNEYFKTPSQGQSMEDKEI<br/>LQGYRSVLNSKTTEESLANFAKWEPRHGRFRYRHPWQQYLRLIGSLTRQCAIRIEALNGYLSSELKASQEIRAKIEDPCKKMSK<br/>DCSCALKELAQAVKTMTPKPSAANCHIANSKIAAKSLKSMKLTGLWQDLDLLEIVPAATVASLLIDIVSSTEEIAESVNELASL<br/>ANFRSVDNTEVAKGESKLSCSSSIKGPHHIITI</p>     |
| ZjALMT2 | <p>SGGRLGFRVKALFEKLKNWVVEIAMKTKKLGEDDPRRIVHSLKVGLAVSLVSLFYNFDFVYDGFSSAMWAVLTVVVVFE<br/>FSVGATLGRGLNRGLATFLAGALGFGAHLANLSGDKVQPILLTLFVFLAACVTFIRFFPRMKARYDYGLLIFILTFMISVS<br/>GYRDEEILEMAHKRVSTILIGGLTALSVCILICPVWAGDDLHNSVANNIEKLGNFLEGFGNVYFKKSEDGESNKAFLQGYKS<br/>VLNLKQSEESQVNFARWEPRHGRFGRHPWKHYLTVTGLTRQCAIRIDALNGYIQSEIQAPLEIGSEMEEACMKMSSES<br/>GKALKELAAATMRTMTLPCSGGGAAPHIAKSRLAAKSLKSLKLTGLMLEDNSTDLLNLVPAATVASLLVDVVCCTEKIDKAIE<br/>ELASLAKFKSSEPTMEDHKPKLNRQMAFLQQRSTSFGPHHVVTI</p> |
| MnALMT2 | <p>LKNLAENVRAKVSQVANNVKKLGKDDPRRIHSLKVGVSLVSLVSIFFYYYQPLYDNFGVSAMWAVMTVVVVFEYTVGATLGK<br/>GLNRGLATLLAGALGVGAHHLASLSGDIGEPILLGFFVFLQAATSTFIRFFPKVKARYDYGLLIFILTFSLISVSGFRDDEILEMA<br/>HKRLSTILIGGSACVVISILVCPVWAGEDLHNLIALNLEKLGNFLEGFGDEYFNNTAMNEESKDDKAYLQGYKSVLNSKSSEE<br/>SLANFARWEPGHGRFKFRHPWKQYLKVGTGLTRQCAIRIEALHGRSLADKIQTSPEIREQIQEACMKVSSSESGKALKELATSV<br/>KKMTKPSSANPHLASSKVAAKSLRSLKSGSWDNIDLLEVIPSVTVASILLDVVNCTEKIAESVNELASLAHFK</p>                                             |
| HsALMT2 | <p>KIRRKVAEFPEKIKKVAQDDPRRVVHSFKFGLAITLVSLFYFFDPLYVGFNSAMWAILTVVVVFEFSVGATLVKGLNRGLATF<br/>LAGALGFGVHHLATLPGDIVRPILLGIFVFILATTVSFIRFFPRMKARYDYGLLIFILTFCLISVSGYRDEEVLQMAHKRVSTILIG<br/>ALAALLVCIFICPVWAGDDLHNLAANNLENLATFLQGFGDEYFTKSSEMESNKASLQGYKSILNSKQVEESWVNSARWEPR<br/>HGRFKFRHPWKQYLMVASLTRQCAIRVEALNGCLSDVQASPETCGKFQETCTEISSESGKAMKELASAIKTMSAPSSHRA<br/>HIAKAKDATEKLNLSLLKTRLCEDIDVVEILAVATVASLLHDVLACTEKISESVHELATLAHFKNEKDGGKQELDKQKQVQKTS<br/>NSIDLNHVITVE</p>                     |
| GhALMT2 | <p>GGSSNSWLALVDSIVKIRSKVAEFPGMKMKVAEDDPRRIVHSFKVGLAITLVSLFYFFDHLYVGFSSAMWAVLTVIVVIEFSV<br/>GATLGKGLNRGLATFLAGTLGFGAHLANLPGRELQPILLGIFVFILAATVSFIRFFPRMKVRYDYGLLIFMLTFCLISVSGYR</p>                                                                                                                                                                                                                                                                                                              |

|         |                                                                                                                                                                                                                                                                                                                                                                                                                                                                                       |
|---------|---------------------------------------------------------------------------------------------------------------------------------------------------------------------------------------------------------------------------------------------------------------------------------------------------------------------------------------------------------------------------------------------------------------------------------------------------------------------------------------|
|         | DEEVLEMAHKRVSTILIGGFTAIFVCIFICPVWAGEDLHNLAANNLEKLASFLEGFGDEYFRKSSEPESNKASLQAYKSILNSK<br>QSEESLVNFARWEPHPGPFRRHPWKQYLKIGSLTRQCAYRIEALNGCLNSDVQASPETCRNFREAFIKASSETGKAVKGLAS<br>AMRTMTLPTGDCPQTAKSKNAADNLKSLRLTGLCEGIDIVEILEVATVASLLLDILACTEKISESIHELASLAHFKRLEPDEKD<br>GNPDLKQKQVWQSSNSIASNHHHHIITIE                                                                                                                                                                                   |
| MiALMT2 | EKAGFCAGAWLLLKGLPEKLKHKVAELASKAIKLGKDDPRRVVHSLKVGLALNVVSLLYLRPLYNDFGVSATWAIMTVVF<br>VFEYSVGATLGKGLNRGFATFIGGALSVGAHQIACLSGEKAEPIMLGLFVFLQAAASTFLRFFPKIKARYDYALLIFILTFSMIS<br>VSGFRDDEIIDLARRRLTILIGGFVCVVICILICPVWAGQDLHNLIATNIDKLGNFLEGFGNEYFNKEGETEDDKSFLQQYKSV<br>LTSKSTEESTNSAKWEPGHGQFQFRHPWNLYLKIGTLTRQCAYRIDALNGYLNAEIQTSEMRYKIEEVYREMSLESGLKALK<br>ELALAIKTMSQPSAATKTHIENSKSAKSLNSLFSNIWGD TDLQA AVPVA AVASLLIDVVACTEKIAQSVYELASMANFKSI<br>EVTLSPEKSQIRQQDNAKSLAKVDDCPYVCVTVN |
| SpALMT2 | KIFANIVGIAKQFKKNAKDDPRRVHSLKVGLSLTLVSLFYFQPLYNGFGVSTMWAIMTVVVVFEFSVGATLGKGLNRGMA<br>TLLAGALGVGAHYLASASGKVVEPILLGLFVFLQAFALTFIRFFPQVKARYDYGMLIFILTFCLVSISGFRVDEIVDLAHKRISTI<br>LMGASVCVIVSIFVCPVWAGEDLHKLVAKNMEKIGNFLEGFGDEIFKSSEDITESKVAKPSLIEYKSVLNSKNTEETLANFAK<br>WEPGHGQFKYRHPWKQYLKIGGLIRQCACRIDALNGYINSEIKAPEEIKEMIKETSMKMSIECGKALKELSKSMRKMNLPIS<br>ADEHVTNAKNSAKKLNSLLKSRINNWEEMNLLQVIPLTTIASILRDIVTCVEEIGQGVNELASLANFK                                                       |
| SlALMT2 | KIFANIVGIAKQFKKNAKDDPRRVHSLKVGLSLTLVSLFYFQPLYNGFGVSTMWAIMTVVVVFEFSVGATLGKGLNRGMA<br>TLLAGALGVGAHYLASASGKVVEPILLGLFVFLQAFALTFIRFFPQVKARYDYGMLIFILTFCLVSISGFRVDEIVDMAHKRIST<br>ILMGASVCIIVSIFVCPVWAGEDLHKLVAKNMEKIGNFLEGFGDEIFKSSEDITESKVAKPSLIEYKSVLNSKNTEETLANFAK<br>WEPGHGQFKYRHPWKQYLKIGGLIRQCACRIDALNGYINSEIKAPEEIKEMIKETSMRMSIECGKALKELSKSMRKMNLPIS<br>ADEHVTNAKNSAKKLNSLLKSRINNWEEMNLLQVIPLTTIASILRDIVTCVEEIGQGVNELASLANFK                                                       |
| CaALMT2 | TNGLLWFKSLYEKLFAKIIGIAKQFKKIGKDDPRRVHSLKVGVALTTLVSLFYFQPLYNGFGVSTMWAIMTVVVVFEFSVGAT<br>LGKGLNRGMATLLAGALGVGAHYLASASGKVVEPILLALFVFLQAFATTIRFFPQVKARYDYGMLIFILTFCLVSISGFRVDE<br>IVDMAHKRLSTILIGASVCVVISIFVCPVWAGEDLHKLVAKNMEKLGKFLEGFGDEIFKSAEVEESKDAKKSLEIYKSVLNSKN<br>AEETLANFARWEPGHGQFKYRHPWRQYLKIGGLIRQCACRIDALNGYINSEIKAPEEIKEKIKETSKEMSIECGKALKELSNS<br>VRKMNLPISADEHITNAKKSANLNSLLKSGINNWEEMNLLQVIPLATIASILTIVICVDEIGQGVNELATLAHFKK                                             |
| AtALMT2 | MEKVREIVREGRRVGKEDPRRVVHAFKVGGLALALVSSFYYYQPLYDNFGVNMWAVMTVVVVFEFSVGATLGKGLNRAVA<br>TLVAGGLGIGAHHLASLSGPTVEPILLAIFVFVLAALSTFVRFFPRVKARYDYGVILIFILTFALISVSGFREDEILDLAHKRLSTVI                                                                                                                                                                                                                                                                                                          |

|          |                                                                                                                                                                                                                                                                                                                                                                                                                                                                                          |
|----------|------------------------------------------------------------------------------------------------------------------------------------------------------------------------------------------------------------------------------------------------------------------------------------------------------------------------------------------------------------------------------------------------------------------------------------------------------------------------------------------|
|          | MGGVSCVLISIFVCPVWAGQDLHSLLASNFDTLSHFLQEFGEYFEATEDGDIKEVEKRRRNLERYSVLNSKSNEEALANF<br>AKWEPRHGQFRFRHPWRQYLAVGALLRQSAYRIDALNSNINSDMQIPMDIKKKIEEPLRRMSSESCKSMKEVSISLKNMTIS<br>SSFDIHVVNSQSACKTLSTLLKSGILNDVEPLQMISLMTTVSLLIDIVNLTEKISESVHELASAA                                                                                                                                                                                                                                              |
| AtALMT7  | MEKVREIVREGRRVAKEDPRRVVHSFKVGLVLALVSSFYFYQPLYDSFGVNAMWAVMTVVVVFEFSVGATLGKGLNRVAAT<br>LFAGGLGIGAHHLASMSGPTGEPILLAVFVFVQAALSTFVRFFPRVKARYDYSLIFILTFALISVSGFREEQVVKLTHKRISTVII<br>GGLSCVIISIFVCPVWAGQDLHSLIASNFEKLSFFLLGNSFHYVSSDLNSITLLRKIKSWRLADFGDKYCEVVENDGAKEVDKR<br>KKDFDNYKSVLNSKSNEESLANFAKWEPPGHGQFRFRHPWKQYLAVGELIRQCAYRIHALNSYLNADNQVSVDIKKKLGEP<br>LRRMSLESCKAMKEMSISLKKMTKPSSSDLHVQNAKSACKSLTNLLNSGILKEVEPELVSLLTAISLLIDIINLTEKILESHEL<br>ATAAKFK                              |
| AtALMT8  | AQEKKAGFFQRLQDFPSKLKDDVTKRVKNVQKFAKDDPRRIHSMKVGVALTLVSLLYYVRPLYISFGVTGMWAILTVVVVF<br>EFTVGGTSLKGLNRGFATLIAGALGVGAVHLARFFGHQGEPIVLGILVFSLGAAATFSRFFPRIKQRYDYGALIFILTFSFVAISG<br>YRTDEILIMAYQRLSTILIGGTICILVSIFICPVWAGEDLHKMIANNINKLAKYLEGFEGEYFQPEKISKETSSCVREYKSILTSKST<br>EDSLANLARWEPGHGRFRLRHPWKKYKIAGLVRQCAVHLEILNGYVLSNDKAPQEFESKIQEPITTMREVGEALKAIKS<br>IKTMRNDSACVNAHIDNSKKAIKNLKIALKSSYPETYKDLLEIIPGVTMASILIEVVNCVEKIYEAVEEFSGLAHFKETLDSKLS<br>AEIGQHQLLHRGCVKPVLDGDNEKEDNSSCHVL |
| AtALMT1  | MEKVREIVREGIRVGNEPRRIIHAFKVGLALVLVSSFYFYQPFPGFTDYFGINAMWAVMTVVVVFEFSVGATLGKGLNRGV<br>ATLVAGGLGIGAHQLARLSGATVEPILLVMLVVFVQAALSTFVRFFPWVTKFDYGILIFILTFALISLSGFRDEEIMDLAESRLST<br>VVIGGVSCILISIFVCPVWAGQDLHSLLASNFDTLSHFLQDFGEYFEAREKGDYKVVEKRRKNLERYKSVLDSKSDDEALAN<br>YAEWEPHGHGQFRFRHPWKQYVAVGALLRQCAYRIDALNSYINSDFQIPVDIKKKLETPLRRMSSESGNSMKEMSISLKQMIK<br>SSSDIHVSNSQAACKSLSTLLKSGILNDVEPLQMISLMTTVSMLIDIVNLTEKISESVHELASAAARFKNKMRPTVLYEKSDSGS<br>IGRAMPIDSHEDHHVTV                   |
| TaALMT1  | RKVGGAAAREPRRVAHSLKVGLALALVSVVYFVTPLFNGLGVSAIWAVLTVVVVMEYTVGATLSKGLNRLATLVAGCIAV<br>GAHQLAELAERCGDQGEPIVLTVLVFFVASAATFLRFIPEIKAKYDYGVTIFILTFGLVAVSSYRVEELIQLAHQRFYTIAGVFI<br>CLCTTVFLFPVWAGEDVHKLASGNLDKLAQFIEGMEFNCFGENSVANNFGGKDSPQMHKSVLNSKATEDSLCTFAKWEPR<br>HGQFRFRHPWSQYQKLGTLCRQCASSMEALASYVITTSKTQCPAAANPELSCKVRKTCGEMSLHSSKVLRDLAMATRTMT<br>VPSPVNITMATAVKAAESLRSELAENTALLQVMHVAVTATLLADLVDRVKEIAECVDVLARLAHFKNPEDTKN                                                           |
| AtALMT10 | WLKDLVMKVIMERVAKFMRKAWRIGADDPKVVHCLKVGLALSLSIFYMRPLYDGVGGNAMWAIMTVVVVFESNVG                                                                                                                                                                                                                                                                                                                                                                                                              |

|          |                                                                                                                                                                                                                                                                                                                                                                                                                              |
|----------|------------------------------------------------------------------------------------------------------------------------------------------------------------------------------------------------------------------------------------------------------------------------------------------------------------------------------------------------------------------------------------------------------------------------------|
|          | <p>ATFCKCVNRVVATILAGSLGIAVHWVATQSGKAEVFIGCSVFLFAFAATYSRFVPSFKARFDYGAMIFILTFSLVSVGGYRVD<br/> KLVELAQQRVSTIAIGTSICIIITVFFCPIWAGSQLHRLIERNLEKLADSLDGCVAEYFKENEVSTNRNEDENTNMKLQGFKCV<br/> LNSKGTTEEAMPLIRFSGFSFSQANLARWEPAHGSFNFRHPWKLYVKIGAAMRRCAYCLENLSICINYETEAPDQVKNHFGE<br/> ACMKLSSASSKILRELADMMKNTRKSSKMDFLVFDMNSAVQELQETLKNVPINETNKPEEVPSEEENKVDSEERTTSMLEHEV<br/> LPVATLVSLLIENAAARIQTAVEAVDELANLADFEQDSKKKTGDNNTKQ</p> |
| AtALMT14 | <p>DRVHERSMGMEEEGSTKNMKTQVLELPTKIKKILKNIWKVGKDDPRRVKHALKVGVSLLTLVSLLYLMEPLFKGIGNSAIWA<br/> VMTVVVVLEFSAGATLCKGLNRGLGTLIAGSLAFFIEFVANDSGKIFRAIFIGA AVFIIGALITYLRFIPYIKKNYDYGMLIFLLTF<br/> NLITVSSYRVDTVIKIAHERFYTIAMGVGICLLMSLLVFPWISGEDLHKSTVAKLQGLSYSIEACVNEYFEEEEKDEETSDLSED<br/> TIYNGYKTVLDSKSADEALAMYASWEPRHTRHCHRFPPWKHYVKVGSVLRQFGYTVVALHGCLKTEIQTTPRPLRGLFKDPC<br/> VRLAGEICKVLSELAASIRN</p>                         |
| AtALMT12 | <p>MEEGLSKTKWMVLEPSEKIKKIPKRLWNVGKEDPRRVHIALKVGSLTLVSLLYLMEPLFKGIGSNAIWAVMTVVVVLEFSA<br/> GATLCKGLNRGLGTLIAGSLAFFIEFVANDSGKVLRAIFIGTAVFIIGAAATYIRFIPYIKKNYDYGVVIFLLTFNLITVSSYRVDS<br/> VINIAHDRFYTIAVGCICLMSLLVFPWISGEDLHKTTVGKLQGLSRSEACVDEYFEEKEKEKTDSDKDRIYEGYQAVLDSKS<br/> TDETLALYANWEPRHTLRCHRFPCQQYVKVGAVLRQFGYTVVALHGCLQTEIQTTPRSVRALFKDPCVRLAGEVCKALTELA<br/> DSI</p>                                               |
| AtALMT13 | <p>KGLNLPKKMKKILRNLWNVGKEDPRRVHIALKVGVALTLVSLLYLMEPFFEGVGKNALWAVMTVVVVLEFSAGATLRKGL<br/> NRGLGTLIAGSLAFFIEWVAIHSGKILGGIFIGTSVFTIGSMITYMRFIPYIKKNYDYGMLVFLTFNLITVSSYRVDTVIKIAHER<br/> LYTIGMGIGICLMSLLFFPIWISGDDLHKSTITKLQGLSRCIEACVSEYFEEKLKDNETSDSESDDDEDLIYNGYNTVLDSKSADE<br/> ALAMYAKWEPRHTRRCNKFPSQQYIKVGSVLRKFGYTVVALHGCLQTEIQTTPRSIRVLFKDPCVRLAGEICKVLSELSESIQN</p>                                                    |
| AtALMT9  | <p>LSEKISGVYDDAKDVARKAWEMGVSDPRKIVFSAKIGLALTIVALLIFYQEPNPDLRSYSVWAILTVVVVFEFTIGATLSKGFN<br/> RALGTLASAGGLALGMAELSTLFGDWEEIFCTLSIFCIGFLATFMKLYPSMKAYEYGFRVFLTYCYILISGFRTGQFIEVAISRFL<br/> IALGAGVSLGVNMFYPIWAGEDLHNLVKNFMNVATSLEGCVNGYLRCLEYERIPSKILTYQASEDPVYKGYRSVESTSQE<br/> ESLMSFAIWEPPHGPYKSNYPWKNYVKLSGALKHCAFTVMALHGCILSEIQAPEERRQVFRQELQRVGVEGAKLLRELGE<br/> KVKKM</p>                                               |
| AtALMT3  | <p>KITGVVKKLKDVLVTAWEMGTADPRKMIFS AKMGLALTLSILIFFKIPGLELSGHYLWAILTVVVIFEFISIGATFSKGCNRLG<br/> TASAGGLALGMSWISEMTGNWADVFNAA SIFVVAFFATYAKLYPTMKPYEYGFRVFLTYCYVIVSGYKTGEFME TAVSRFL<br/> IALGASVGLIVNTCIYPIWAGEDLHNLVAKNFVNVATSLEGCVNGYLECVAYDTIPSRILVYEAVAEDPVYSGYRS AVQSTSQE</p>                                                                                                                                             |

|          |                                                                                                                                                                                                                                                                                                                                                                         |
|----------|-------------------------------------------------------------------------------------------------------------------------------------------------------------------------------------------------------------------------------------------------------------------------------------------------------------------------------------------------------------------------|
|          | DTLMSFASWEPPHGPYKSFYRPWALYVKVGGALRHCAIMVMALHGCILSEIQAAEDRRREFRNELQRVGIEGAKVLR YIGES<br>LKKM                                                                                                                                                                                                                                                                             |
| AtALMT6  | ELGHSDRRRIFFAVKMGMALALCSVVIFLKEPLHDASKYSVWGILTVVVVFEYSVGATLVKGFNRAIGTVSAGGLALGIARLS<br>VLSRDFEQTHIITCIFLAGFIASYSKLHPAMKPYEYAFRVLLTFCIVLVSGNNTGDDFFSTAYYRFLFIVVGATTCLVVNIFIFIWA<br>GEDLHKLVANNFKSVANSLEGCVNGYLQCVEYERVP SKILTYQTSDDPLYSGYRSAIQSTNQEESLLDFAIWEPPHGPYRTFN<br>HPWK NYVKLSGAVRHCAFTVMAIHGCILSEIQAAPEKRQAFRHELQRVGN EGAKVLR LIGEKVEKM                         |
| AtALMT4  | SDGITASWKALYDIGAKLYEMGRSDRRKVYFSVKMGMALALCSFVIYLKEPLRDASKYAVWAILTVVVVFEYSIGATLVKGFN<br>RAIGTLSAGGLALGIARLSVSAGEFEELIIISIFIAGFSASYLKLYPAMKSYEYAFRVLLTYCIVLVSGNNSRDFFSTAYYRFL LIL<br>VGAGICLGVNIFILPIWAGEDLHKL VVKNFKSVANSLEGCVNGYLQCVEYERIPSKILTYQASDDPLYSGYRSVVQSTS QEDSL<br>LDFAVWEPPHGPYKTFHHPWANYVKLSGAVRHCAFMVMAMHGCILSEIQAAPEKRQAFRQELQRVGN EGAKVLR LFG EK<br>VEKM |
| AtALMT5  | KLYALGHSDRRKLYFSIKMGIALALCSFVIFLKEPLQDASKFAVWAILTVVLIFEYYVGATLVKGFNRALGTMLAGGLALGVA<br>QLSVLAGEFEEV IIVICIFLAGFGASYLKLYASMKPYEYAFRVFKLTYCIVLVSGNNSRD FLSTAYYRILLIGLGATICLLVNVFLFP<br>IWAGEDLHKLVAKNFKNVANSLEGCVNGYLQCVEYERIPSKILTYQASDDPLYSGYRS AVQSTS QEDSLLDFAIWEPPHGPYK<br>TFNHPWK NYVKLSGAVRHCAFTVMAMHGCILSEIQASPEKRHVFSNELRRVGN EGAKVLR LFG EK<br>VEKM             |
| AtALMT11 | LSKTKWMVLEPSEKIKKIPKRLWSVGKEDPRRVIHAFKVGHSLTLVSLLYFMENLFGKIGSN AIWAVMTV VAVLLEF                                                                                                                                                                                                                                                                                         |
